# Supplementary material for: Physiological stress reactivity and recovery related to behavioral traits in dogs (Canis familiaris)
Source: PubMed Central journal article supplement (PMC6748563; doi:10.1371/journal.pone.0222581), 2019-09-17
Supplement: pone.0222581.s003.pdf [file pone.0222581.s003.pdf]

### S1 Table

Overview of collected saliva volume (mean  $\pm$  SD over three samples) and measured variables, for each dog at both test stages.

| Breed               | T1 (puppy)        |                         |                         |                         | T2 (young adult)  |                         |                         |                         |
|---------------------|-------------------|-------------------------|-------------------------|-------------------------|-------------------|-------------------------|-------------------------|-------------------------|
|                     | Volume ( $\mu$ L) | CgA                     | Cortisol                | sIgA                    | Volume ( $\mu$ L) | CgA                     | Cortisol                | sIgA                    |
| BSD                 | 181 $\pm$ 252     | $\Delta$ 10             | $\Delta$ 40             |                         |                   |                         |                         |                         |
| BSD                 | -                 |                         |                         |                         |                   |                         |                         |                         |
| X BSD / BMD         | 55 $\pm$ 52       | $\Delta$ 10 $\Delta$ 40 |                         |                         |                   |                         |                         |                         |
| GSD                 | 169 $\pm$ 156     | $\Delta$ 10 $\Delta$ 40 | $\Delta$ 10 $\Delta$ 40 |                         |                   |                         |                         |                         |
| Dogo Argentino      | 68 $\pm$ 8        | $\Delta$ 10 $\Delta$ 40 | $\Delta$ 10 $\Delta$ 40 | $\Delta$ 10             |                   |                         |                         |                         |
| Great Dane          | -                 | $\Delta$ 10 $\Delta$ 40 |                         | $\Delta$ 10 $\Delta$ 40 |                   |                         |                         |                         |
| Rottweiler          | 182 $\pm$ 74      | $\Delta$ 10 $\Delta$ 40 | $\Delta$ 10 $\Delta$ 40 | $\Delta$ 10 $\Delta$ 40 |                   |                         |                         |                         |
| AmStaff             | 20 $\pm$ 25       |                         |                         |                         |                   |                         |                         |                         |
| AmStaff             | 75 $\pm$ 3        | $\Delta$ 10 $\Delta$ 40 | $\Delta$ 10 $\Delta$ 40 | $\Delta$ 10 $\Delta$ 40 |                   |                         |                         |                         |
| Engl. Cocker Sp.    | 104 $\pm$ 64      | $\Delta$ 10 $\Delta$ 40 |                         | $\Delta$ 40             |                   |                         |                         |                         |
| Labrador Retriever  | 40 $\pm$ 32*      |                         |                         | $\Delta$ 10             |                   |                         |                         |                         |
| Port. Water Dog     | 77 $\pm$ 29       | $\Delta$ 10 $\Delta$ 40 | $\Delta$ 10 $\Delta$ 40 |                         |                   |                         |                         |                         |
| Shih Tzu            | 233 $\pm$ 189     |                         |                         | $\Delta$ 10 $\Delta$ 40 |                   |                         |                         |                         |
| Shih Tzu            | 233 $\pm$ 21      | $\Delta$ 10 $\Delta$ 40 | $\Delta$ 10 $\Delta$ 40 | $\Delta$ 10 $\Delta$ 40 |                   |                         |                         |                         |
| Whippet             | 15 $\pm$ 19*      |                         |                         |                         |                   |                         |                         |                         |
| American Bulldog    | 129 $\pm$ 40      |                         | $\Delta$ 10 $\Delta$ 40 |                         |                   |                         |                         |                         |
| Border Collie       | 80 $\pm$ 57*      | $\Delta$ 10 $\Delta$ 40 | $\Delta$ 10 $\Delta$ 40 | $\Delta$ 10 $\Delta$ 40 | 461*              | $\Delta$ 10             | $\Delta$ 10             | $\Delta$ 10             |
| Border Collie       | 88 $\pm$ 63       |                         | $\Delta$ 10 $\Delta$ 40 | $\Delta$ 10 $\Delta$ 40 | 35 $\pm$ 23       | $\Delta$ 10 $\Delta$ 40 |                         | $\Delta$ 10 $\Delta$ 40 |
| Border Collie       | -                 | $\Delta$ 10 $\Delta$ 40 |                         | $\Delta$ 10 $\Delta$ 40 | 43 $\pm$ 32       | $\Delta$ 10 $\Delta$ 40 | $\Delta$ 10             | $\Delta$ 10 $\Delta$ 40 |
| Border Collie       | 236 $\pm$ 140     | $\Delta$ 10 $\Delta$ 40 | $\Delta$ 10 $\Delta$ 40 | $\Delta$ 10 $\Delta$ 40 | 142 $\pm$ 32      | $\Delta$ 10 $\Delta$ 40 | $\Delta$ 10 $\Delta$ 40 |                         |
| X B. Collie / Husky | 130 $\pm$ 39      | $\Delta$ 10 $\Delta$ 40 | $\Delta$ 10 $\Delta$ 40 | $\Delta$ 10 $\Delta$ 40 | 433 $\pm$ 146     | $\Delta$ 10 $\Delta$ 40 | $\Delta$ 10 $\Delta$ 40 | $\Delta$ 10 $\Delta$ 40 |
| BSD                 | -                 |                         | $\Delta$ 10 $\Delta$ 40 | $\Delta$ 10 $\Delta$ 40 | 136 $\pm$ 160     |                         |                         |                         |
| BMD                 | 75 $\pm$ 23       | $\Delta$ 40             | $\Delta$ 10 $\Delta$ 40 |                         | 41 $\pm$ 14       |                         | $\Delta$ 40             |                         |
| St. Bernard         | 98 $\pm$ 74       |                         | $\Delta$ 10 $\Delta$ 40 |                         | 127 $\pm$ 48      | $\Delta$ 10 $\Delta$ 40 | $\Delta$ 10 $\Delta$ 40 | $\Delta$ 40             |
| Dachshund           | 11 $\pm$ 9        |                         |                         |                         | 30 $\pm$ 45       |                         |                         | $\Delta$ 10 $\Delta$ 40 |
| Engl. Cocker Sp.    | 31 $\pm$ 30       | $\Delta$ 10             |                         | $\Delta$ 10             | 39 $\pm$ 41       |                         |                         |                         |
| Am. Cocker Sp.      | 17 $\pm$ 18       | $\Delta$ 40             |                         |                         | 11 $\pm$ 15       |                         |                         |                         |
| Fl. C. Retriever    | 95 $\pm$ 31       | $\Delta$ 10 $\Delta$ 40 | $\Delta$ 10 $\Delta$ 40 |                         | 67 $\pm$ 25       | $\Delta$ 10 $\Delta$ 40 | $\Delta$ 10 $\Delta$ 40 |                         |
| Boston Terrier      | 27 $\pm$ 38       |                         |                         |                         | 29 $\pm$ 26       | $\Delta$ 10             |                         |                         |
| French Bulldog      | -                 | $\Delta$ 10 $\Delta$ 40 |                         | $\Delta$ 10             | 51 $\pm$ 35       | $\Delta$ 10 $\Delta$ 40 | $\Delta$ 40             |                         |
| X Tibetan Terrier   | 93 $\pm$ 25*      | $\Delta$ 10             | $\Delta$ 10             |                         | 130 $\pm$ 97      | $\Delta$ 10             | $\Delta$ 10 $\Delta$ 40 | $\Delta$ 10             |
| X                   | 110 $\pm$ 31      | $\Delta$ 10 $\Delta$ 40 | $\Delta$ 10 $\Delta$ 40 | $\Delta$ 10             | 133 $\pm$ 72      | $\Delta$ 40             | $\Delta$ 10 $\Delta$ 40 | $\Delta$ 10 $\Delta$ 40 |

-: mean volume could not be calculated due to missing data; \* based on one (no SD) or two samples

$\Delta$ 10 /  $\Delta$ 40: change in salivary stress marker concentration 10 / 40 min after the behavioral test compared to baseline (pre-test)
