# Supplementary material for: Physiological stress reactivity and recovery related to behavioral traits in dogs (Canis familiaris)
Source: PubMed Central journal article supplement (PMC6748563; doi:10.1371/journal.pone.0222581), 2019-09-17
Supplement: pone.0222581.s004.pdf [file pone.0222581.s004.pdf]

**S2 Table**

Tested associations (Mann-Whitney U test) between dogs' physiological responses to a behavioral test (weak/strong) and C-BARQ scores (owner ratings).

| Marker            | Physiol. change  | Marker range      |                  |        | C-BARQ            | Weak response  |                   | Strong response |      | U    | P    | N    | ES   |
|-------------------|------------------|-------------------|------------------|--------|-------------------|----------------|-------------------|-----------------|------|------|------|------|------|
|                   |                  | Group             | Min              | Max    |                   | (median ± IQR) | (median ± IQR)    |                 |      |      |      |      |      |
| CgA               | $\Delta 10_{T1}$ | Weak              | -42.15           | -0.49  | SDA <sub>T1</sub> | 0.15           | 0.40              | 0.10            | 0.30 | 41.0 | 0.73 | 19   |      |
|                   |                  |                   |                  |        | ODA <sub>T1</sub> | 0.13           | 0.51              | 0.13            | 0.25 | 41.5 | 0.77 | 19   |      |
|                   |                  | Strong            | 4.74             | 113.92 | DDA <sub>T1</sub> | 0.50           | 0.75              | 0.25            | 0.67 | 38.5 | 0.86 | 18   |      |
|                   |                  |                   |                  |        | DDF <sub>T1</sub> | 0.88           | 1.00              | 0.75            | 0.33 | 40.5 | 0.71 | 19   |      |
|                   |                  | RIV <sub>T1</sub> | 1.00             | 1.50   | 1.25              | 2.25           | 7.0               | 0.77            | 8    |      |      |      |      |
|                   |                  | TRA <sub>T1</sub> | 2.50             | 0.88   | 2.50              | 0.25           | 39.0              | 0.62            | 19   |      |      |      |      |
|                   |                  | CHA <sub>T1</sub> | 1.00             | 2.00   | 0.75              | 1.50           | 26.5              | 0.59            | 16   |      |      |      |      |
|                   |                  | SDF <sub>T1</sub> | 0.25             | 0.25   | 0.00              | 0.50           | 42.0              | 0.79            | 19   |      |      |      |      |
|                   |                  | NSF <sub>T1</sub> | 1.09             | 0.84   | 0.80              | 0.66           | 32.5              | 0.31            | 19   |      |      |      |      |
|                   |                  | SEP <sub>T1</sub> | 1.07             | 0.39   | 0.63              | 0.25           | 17.5              | <b>0.02</b>     | 19   | 0.83 |      |      |      |
|                   |                  | TCH <sub>T1</sub> | 0.71             | 1.25   | 0.50              | 0.75           | 26.0              | 0.38            | 17   |      |      |      |      |
|                   |                  | EXC <sub>T1</sub> | 2.09             | 1.16   | 1.84              | 1.17           | 28.5              | 0.30            | 18   |      |      |      |      |
|                   |                  | ATT <sub>T1</sub> | 2.09             | 0.83   | 1.83              | 1.00           | 41.0              | 0.74            | 19   |      |      |      |      |
|                   |                  | NRG <sub>T1</sub> | 3.00             | 1.00   | 2.50              | 1.00           | 33.5              | 0.34            | 19   |      |      |      |      |
|                   |                  | CgA               | $\Delta 40_{T1}$ | Weak   | -60.67            | -8.01          | SDA <sub>T1</sub> | 0.15            | 0.25 | 0.05 | 0.30 | 39.0 | 0.89 |
| ODA <sub>T1</sub> | 0.13             |                   |                  |        |                   |                | 0.57              | 0.13            | 0.25 | 35.0 | 0.62 | 18   |      |
| Strong            | 2.91             |                   |                  | 61.85  | DDA <sub>T1</sub> | 0.00           | 0.88              | 0.25            | 0.67 | 33.5 | 0.51 | 18   |      |
|                   |                  |                   |                  |        | DDF <sub>T1</sub> | 1.13           | 0.50              | 0.88            | 1.00 | 24.0 | 0.14 | 18   |      |
| RIV <sub>T1</sub> | 1.50             |                   |                  | 1.50   | 0.50              | 1.00           | 4.5               | 0.37            | 8    |      |      |      |      |
| TRA <sub>T1</sub> | 2.57             |                   |                  | 0.82   | 2.38              | 0.25           | 18.0              | <b>0.04</b>     | 18   | 0.78 |      |      |      |
| CHA <sub>T1</sub> | 0.25             |                   |                  | 1.13   | 1.38              | 1.09           | 16.0              | 0.09            | 16   |      |      |      |      |
| SDF <sub>T1</sub> | 0.25             |                   |                  | 0.50   | 0.13              | 0.50           | 39.5              | 0.93            | 18   |      |      |      |      |
| NSF <sub>T1</sub> | 1.17             |                   |                  | 0.42   | 1.17              | 1.17           | 32.0              | 0.45            | 18   |      |      |      |      |
| SEP <sub>T1</sub> | 0.94             |                   |                  | 0.50   | 0.76              | 0.50           | 39.5              | 0.93            | 18   |      |      |      |      |
| TCH <sub>T1</sub> | 0.25             |                   |                  | 1.13   | 0.50              | 0.71           | 28.5              | 0.75            | 16   |      |      |      |      |
| EXC <sub>T1</sub> | 2.09             |                   |                  | 1.17   | 1.00              | 1.33           | 19.5              | 0.11            | 17   |      |      |      |      |
| ATT <sub>T1</sub> | 2.17             |                   |                  | 0.67   | 1.83              | 0.83           | 28.5              | 0.29            | 18   |      |      |      |      |
| NRG <sub>T1</sub> | 2.50             |                   |                  | 1.25   | 2.75              | 1.50           | 39.0              | 0.89            | 18   |      |      |      |      |
| Cortisol          | $\Delta 10_{T1}$ |                   |                  | Weak   | -8.92             | 0.46           | SDA <sub>T1</sub> | 0.00            | 0.35 | 0.24 | 0.25 | 20.0 | 0.19 |
|                   |                  | ODA <sub>T1</sub> | 0.13             |        |                   |                | 0.19              | 0.07            | 0.67 | 29.5 | 0.78 | 16   |      |
|                   |                  | Strong            | 0.50             | 4.43   | DDA <sub>T1</sub> | 0.25           | 0.75              | 0.59            | 0.63 | 30.0 | 0.55 | 17   |      |
|                   |                  |                   |                  |        | DDF <sub>T1</sub> | 1.25           | 1.42              | 1.00            | 0.29 | 31.5 | 0.66 | 17   |      |
|                   |                  | RIV <sub>T1</sub> | 0.00             | 0.25   | 0.50              | 1.00           | 5.5               | 0.22            | 9    |      |      |      |      |
|                   |                  | TRA <sub>T1</sub> | 2.50             | 0.38   | 2.44              | 0.44           | 25.0              | 0.28            | 17   |      |      |      |      |
|                   |                  | CHA <sub>T1</sub> | 0.33             | 2.25   | 1.25              | 1.59           | 27.5              | 0.95            | 15   |      |      |      |      |
|                   |                  | SDF <sub>T1</sub> | 0.00             | 0.00   | 0.25              | 0.25           | 19.0              | 0.07            | 17   |      |      |      |      |
|                   |                  | NSF <sub>T1</sub> | 1.09             | 1.09   | 1.09              | 0.94           | 28.0              | 0.67            | 16   |      |      |      |      |
|                   |                  | SEP <sub>T1</sub> | 0.63             | 0.87   | 0.88              | 0.56           | 33.0              | 0.77            | 17   |      |      |      |      |
|                   |                  | TCH <sub>T1</sub> | 0.63             | 0.84   | 1.00              | 1.50           | 25.0              | 0.72            | 15   |      |      |      |      |
|                   |                  | EXC <sub>T1</sub> | 1.83             | 0.83   | 1.00              | 1.83           | 24.0              | 0.43            | 16   |      |      |      |      |
|                   |                  | ATT <sub>T1</sub> | 2.17             | 0.67   | 1.59              | 0.59           | 16.0              | 0.05            | 17   |      |      |      |      |
|                   |                  | NRG <sub>T1</sub> | 2.50             | 1.00   | 2.25              | 1.25           | 34.0              | 0.85            | 17   |      |      |      |      |
|                   |                  | Cortisol          | $\Delta 40_{T1}$ | Weak   | -7.45             | 1.94           | SDA <sub>T1</sub> | 0.00            | 0.20 | 0.30 | 0.30 | 14.5 | 0.06 |
| ODA <sub>T1</sub> | 0.13             |                   |                  |        |                   |                | 0.13              | 0.00            | 0.63 | 31.0 | 0.95 | 16   |      |
| Strong            | 2.71             |                   |                  | 9.32   | DDA <sub>T1</sub> | 0.00           | 0.75              | 0.58            | 0.34 | 25.5 | 0.30 | 17   |      |
|                   |                  |                   |                  |        | DDF <sub>T1</sub> | 0.50           | 1.25              | 1.00            | 0.13 | 30.0 | 0.56 | 17   |      |
| RIV <sub>T1</sub> | 0.00             |                   |                  | 0.00   | 1.00              | 1.00           | 3.5               | <b>0.04</b>     | 10   | 0.86 |      |      |      |

| Marker | Physiol. change   | Marker range      |                   | C-BARQ | Weak response     |                | Strong response |      | U    | P    | N           | ES |      |
|--------|-------------------|-------------------|-------------------|--------|-------------------|----------------|-----------------|------|------|------|-------------|----|------|
|        |                   | Group             | Min               |        | Max               | (median ± IQR) | (median ± IQR)  |      |      |      |             |    |      |
| sIgA   | Δ10 <sub>T1</sub> | Weak              | 1.82              | 29.88  | TRA <sub>T1</sub> | 2.50           | 0.38            | 2.44 | 0.50 | 28.5 | 0.46        | 17 | 0.80 |
|        |                   |                   |                   |        | CHA <sub>T1</sub> | 0.54           | 1.50            | 1.50 | 1.67 | 25.0 | 0.73        | 15 |      |
|        |                   |                   |                   |        | SDF <sub>T1</sub> | 0.00           | 0.00            | 0.25 | 0.25 | 14.5 | <b>0.03</b> | 17 |      |
|        |                   |                   |                   |        | NSF <sub>T1</sub> | 1.00           | 0.50            | 1.17 | 1.00 | 29.0 | 0.79        | 16 |      |
|        |                   |                   |                   |        | SEP <sub>T1</sub> | 0.88           | 0.75            | 0.76 | 0.44 | 30.0 | 0.56        | 17 |      |
|        |                   | TCH <sub>T1</sub> | 0.50              | 1.00   | 0.63              | 1.50           | 24.5            | 0.76 | 15   |      |             |    |      |
|        |                   | EXC <sub>T1</sub> | 1.83              | 1.00   | 1.00              | 1.33           | 23.5            | 0.39 | 16   |      |             |    |      |
|        |                   | ATT <sub>T1</sub> | 2.17              | 0.67   | 1.50              | 1.16           | 18.0            | 0.08 | 17   |      |             |    |      |
|        |                   | NRG <sub>T1</sub> | 2.50              | 1.00   | 2.00              | 0.50           | 27.0            | 0.38 | 17   |      |             |    |      |
|        |                   | SDA <sub>T1</sub> | 0.15              | 0.30   | 0.00              | 0.30           | 22.0            | 0.53 | 15   |      |             |    |      |
|        | Strong            | ODA <sub>T1</sub> | 0.26              | 0.58   | 0.13              | 0.51           | 22.0            | 0.55 | 15   |      |             |    |      |
|        |                   | DDA <sub>T1</sub> | 0.67              | 0.50   | 0.25              | 0.50           | 17.0            | 0.23 | 15   |      |             |    |      |
|        |                   | DDF <sub>T1</sub> | 1.50              | 1.42   | 0.75              | 0.75           | 27.5            | 0.67 | 16   |      |             |    |      |
|        |                   | RIV <sub>T1</sub> | 0.50              | 4.00   | 0.00              | 1.50           | 5.5             | 0.53 | 8    |      |             |    |      |
|        |                   | TRA <sub>T1</sub> | 2.25              | 0.62   | 2.50              | 0.37           | 15.5            | 0.09 | 16   |      |             |    |      |
|        |                   | CHA <sub>T1</sub> | 1.25              | 1.67   | 0.25              | 1.13           | 16.0            | 0.55 | 13   |      |             |    |      |
|        |                   | SDF <sub>T1</sub> | 0.25              | 1.00   | 0.00              | 0.25           | 24.0            | 0.39 | 16   |      |             |    |      |
|        |                   | NSF <sub>T1</sub> | 1.09              | 0.67   | 1.17              | 0.84           | 24.0            | 0.72 | 15   |      |             |    |      |
|        |                   | SEP <sub>T1</sub> | 0.88              | 0.70   | 0.63              | 0.50           | 18.5            | 0.17 | 16   |      |             |    |      |
|        |                   | TCH <sub>T1</sub> | 0.75              | 0.25   | 0.33              | 0.50           | 11.0            | 0.12 | 14   |      |             |    |      |
| sIgA   | Δ40 <sub>T1</sub> | Weak              | 11.21             | 158.71 | EXC <sub>T1</sub> | 1.67           | 0.60            | 2.00 | 1.50 | 25.5 | 0.86        | 15 |      |
|        |                   |                   |                   |        | ATT <sub>T1</sub> | 2.17           | 0.83            | 2.00 | 0.67 | 26.5 | 0.59        | 16 |      |
|        |                   |                   |                   |        | NRG <sub>T1</sub> | 3.00           | 1.50            | 2.50 | 1.00 | 28.0 | 0.71        | 16 |      |
|        |                   |                   |                   |        | SDA <sub>T1</sub> | 0.00           | 0.00            | 0.15 | 0.20 | 6.5  | 0.10        | 11 |      |
|        |                   |                   |                   |        | ODA <sub>T1</sub> | 0.13           | 0.25            | 0.44 | 0.57 | 9.0  | 0.27        | 11 |      |
|        |                   | Strong            | DDA <sub>T1</sub> | 0.13   | 0.25              | 0.59           | 1.00            | 10.0 | 0.18 | 12   |             |    |      |
|        |                   |                   | DDF <sub>T1</sub> | 0.46   | 1.25              | 1.38           | 1.33            | 7.5  | 0.09 | 12   |             |    |      |
|        |                   |                   | RIV <sub>T1</sub> | -      | -                 | -              | -               | -    | -    | 5    |             |    |      |
|        |                   |                   | TRA <sub>T1</sub> | 2.32   | 0.13              | 2.57           | 0.37            | 8.0  | 0.10 | 12   |             |    |      |
|        |                   |                   | CHA <sub>T1</sub> | 0.38   | 1.00              | 0.25           | 1.67            | 8.0  | 0.61 | 9    |             |    |      |
| CgA    | Δ10 <sub>T2</sub> | Weak              | -58.14            | -2.78  | SDF <sub>T1</sub> | 0.00           | 0.00            | 0.25 | 0.25 | 11.0 | 0.21        | 12 |      |
|        |                   |                   |                   |        | NSF <sub>T1</sub> | 1.00           | 0.50            | 1.42 | 0.67 | 9.0  | 0.27        | 11 |      |
|        |                   |                   |                   |        | SEP <sub>T1</sub> | 0.63           | 0.38            | 1.07 | 0.87 | 13.5 | 0.47        | 12 |      |
|        |                   |                   |                   |        | TCH <sub>T1</sub> | 0.63           | 0.50            | 0.75 | 1.17 | 7.0  | 0.45        | 9  |      |
|        |                   |                   |                   |        | EXC <sub>T1</sub> | 1.42           | 1.00            | 2.00 | 0.83 | 9.5  | 0.31        | 11 |      |
|        |                   | Strong            | ATT <sub>T1</sub> | 1.67   | 0.33              | 2.17           | 0.83            | 13.0 | 0.42 | 12   |             |    |      |
|        |                   |                   | NRG <sub>T1</sub> | 2.25   | 1.50              | 2.50           | 1.00            | 18.0 | 1.00 | 12   |             |    |      |
|        |                   |                   | SDA <sub>T2</sub> | 0.75   | 0.80              | 0.45           | 0.44            | 7.5  | 0.33 | 10   |             |    |      |
|        |                   |                   | ODA <sub>T2</sub> | 0.07   | 0.25              | 0.00           | 0.57            | 10.5 | 0.72 | 10   |             |    |      |
|        |                   |                   | DDA <sub>T2</sub> | 0.67   | 1.00              | 1.00           | 1.00            | 10.5 | 0.75 | 10   |             |    |      |
| CgA    | Δ40 <sub>T2</sub> | Weak              | -58.14            | -2.78  | DDF <sub>T2</sub> | 1.00           | 1.00            | 0.50 | 1.13 | 9.5  | 0.59        | 10 |      |
|        |                   |                   |                   |        | RIV <sub>T2</sub> | -              | -               | -    | -    | -    | -           | 3  |      |
|        |                   |                   |                   |        | TRA <sub>T2</sub> | 2.88           | 1.00            | 2.88 | 0.44 | 12.0 | 1.00        | 10 |      |
|        |                   |                   |                   |        | CHA <sub>T2</sub> | 2.42           | 2.17            | 1.75 | 1.42 | 9.5  | 0.59        | 10 |      |
|        |                   |                   |                   |        | SDF <sub>T2</sub> | 0.75           | 1.00            | 0.00 | 0.00 | 2.0  | <b>0.02</b> | 10 |      |
|        |                   | Strong            | NSF <sub>T2</sub> | 0.92   | 0.66              | 1.00           | 1.00            | 11.5 | 0.91 | 10   |             |    |      |
|        |                   |                   | SEP <sub>T2</sub> | 0.94   | 0.37              | 0.44           | 1.01            | 8.5  | 0.45 | 10   |             |    |      |
|        |                   |                   | TCH <sub>T2</sub> | 0.88   | 0.33              | 1.00           | 1.00            | 10.5 | 0.74 | 10   |             |    |      |
|        |                   |                   | EXC <sub>T2</sub> | 2.00   | 0.83              | 1.59           | 1.17            | 7.0  | 0.28 | 10   |             |    |      |
|        |                   |                   |                   |        |                   |                |                 |      |      | 0.76 |             |    |      |

| Marker            | Physiol. change   | Marker range      |        | C-BARQ | Weak response     |                | Strong response |             | U    | P    | N    | ES |  |
|-------------------|-------------------|-------------------|--------|--------|-------------------|----------------|-----------------|-------------|------|------|------|----|--|
|                   |                   | Group             | Min    |        | Max               | (median ± IQR) | (median ± IQR)  |             |      |      |      |    |  |
| CgA               | Δ40 <sub>T2</sub> | Weak              | -65.61 | -4.43  | ATT <sub>T2</sub> | 2.92           | 1.16            | 2.00        | 1.09 | 4.5  | 0.11 | 10 |  |
|                   |                   |                   |        |        | NRG <sub>T2</sub> | 2.25           | 2.00            | 2.00        | 2.25 | 11.5 | 0.91 | 10 |  |
|                   |                   | Strong            | 1.04   | 20.44  | SDA <sub>T2</sub> | 0.95           | 0.61            | 0.30        | 0.60 | 2.5  | 0.11 | 8  |  |
|                   |                   |                   |        |        | ODA <sub>T2</sub> | 0.13           | 0.25            | 0.00        | 0.13 | 6.0  | 0.49 | 8  |  |
|                   |                   | DDA <sub>T2</sub> | 1.00   | 0.84   | 0.50              | 1.13           | 4.5             | 0.31        | 8    |      |      |    |  |
|                   |                   | DDF <sub>T2</sub> | 0.75   | 1.00   | 0.63              | 1.75           | 7.0             | 0.76        | 8    |      |      |    |  |
|                   |                   | RIV <sub>T2</sub> | 1.50   | 0.00   | 0.50              | 0.75           | 0.0             | 0.18        | 4    |      |      |    |  |
|                   |                   | TRA <sub>T2</sub> | 2.94   | 0.44   | 2.75              | 1.07           | 6.0             | 0.56        | 8    |      |      |    |  |
|                   |                   | CHA <sub>T2</sub> | 2.50   | 1.17   | 0.59              | 1.34           | 2.0             | 0.08        | 8    |      |      |    |  |
|                   |                   | SDF <sub>T2</sub> | 0.25   | 1.50   | 0.50              | 1.13           | 8.0             | 1.00        | 8    |      |      |    |  |
|                   |                   | NSF <sub>T2</sub> | 1.25   | 1.50   | 1.09              | 0.42           | 7.5             | 0.88        | 8    |      |      |    |  |
|                   |                   | SEP <sub>T2</sub> | 1.13   | 0.38   | 0.44              | 0.94           | 2.0             | 0.08        | 8    |      |      |    |  |
|                   |                   | TCH <sub>T2</sub> | 1.00   | 0.63   | 0.88              | 1.00           | 8.0             | 1.00        | 8    |      |      |    |  |
|                   |                   | EXC <sub>T2</sub> | 2.58   | 0.92   | 1.42              | 0.59           | 0.0             | <b>0.02</b> | 8    | 1.00 |      |    |  |
|                   |                   | ATT <sub>T2</sub> | 3.00   | 0.97   | 2.34              | 0.75           | 3.5             | 0.19        | 8    |      |      |    |  |
|                   |                   | NRG <sub>T2</sub> | 2.75   | 1.75   | 2.50              | 2.00           | 6.0             | 0.55        | 8    |      |      |    |  |
| Cortisol          | Δ10 <sub>T2</sub> | Weak              | -1.88  | 0.99   | SDA <sub>T2</sub> | 0.50           | 0.80            | 0.84        | 0.56 | 7.0  | 0.77 | 8  |  |
|                   |                   |                   |        |        | ODA <sub>T2</sub> | 0.07           | 0.19            | 0.13        | 0.69 | 6.5  | 0.64 | 8  |  |
|                   |                   | Strong            | 1.36   | 3.35   | DDA <sub>T2</sub> | 0.13           | 0.75            | 1.13        | 0.71 | 2.5  | 0.11 | 8  |  |
|                   |                   |                   |        |        | DDF <sub>T2</sub> | 0.38           | 1.00            | 1.25        | 0.75 | 2.5  | 0.10 | 8  |  |
|                   |                   | RIV <sub>T2</sub> | 0.75   | 1.50   | 0.50              | 0.00           | 1.0             | 0.65        | 4    |      |      |    |  |
|                   |                   | TRA <sub>T2</sub> | 2.38   | 0.63   | 3.13              | 0.44           | 0.5             | <b>0.03</b> | 8    | 0.97 |      |    |  |
|                   |                   | CHA <sub>T2</sub> | 1.84   | 2.54   | 2.29              | 1.29           | 6.0             | 0.56        | 8    |      |      |    |  |
|                   |                   | SDF <sub>T2</sub> | 0.13   | 0.75   | 0.50              | 1.75           | 7.0             | 0.76        | 8    |      |      |    |  |
|                   |                   | NSF <sub>T2</sub> | 1.17   | 0.83   | 1.75              | 1.50           | 5.0             | 0.39        | 8    |      |      |    |  |
|                   |                   | SEP <sub>T2</sub> | 0.32   | 1.01   | 1.07              | 0.26           | 4.0             | 0.25        | 8    |      |      |    |  |
|                   |                   | TCH <sub>T2</sub> | 1.13   | 0.79   | 0.88              | 1.00           | 6.0             | 0.56        | 8    |      |      |    |  |
|                   |                   | EXC <sub>T2</sub> | 2.09   | 1.25   | 1.92              | 1.42           | 7.5             | 0.88        | 8    |      |      |    |  |
|                   |                   | ATT <sub>T2</sub> | 2.25   | 0.75   | 2.34              | 1.05           | 7.5             | 0.88        | 8    |      |      |    |  |
|                   |                   | NRG <sub>T2</sub> | 2.00   | 2.50   | 3.25              | 1.25           | 3.0             | 0.14        | 8    |      |      |    |  |
|                   |                   | SDA <sub>T2</sub> | 0.70   | 0.50   | 0.95              | 0.66           | 4.5             | 0.31        | 8    |      |      |    |  |
|                   |                   | ODA <sub>T2</sub> | 0.07   | 0.19   | 0.13              | 0.25           | 7.0             | 0.75        | 8    |      |      |    |  |
| DDA <sub>T2</sub> | 0.13              | 0.88              | 0.79   | 1.09   | 6.0               | 0.55           | 8               |             |      |      |      |    |  |
| DDF <sub>T2</sub> | 0.25              | 0.38              | 1.25   | 0.63   | 3.5               | 0.18           | 8               |             |      |      |      |    |  |
| RIV <sub>T2</sub> | 0.38              | 0.75              | 0.75   | 1.50   | 1.5               | 0.68           | 4               |             |      |      |      |    |  |
| TRA <sub>T2</sub> | 2.44              | 0.69              | 2.88   | 0.50   | 2.5               | 0.11           | 8               |             |      |      |      |    |  |
| CHA <sub>T2</sub> | 1.96              | 1.96              | 2.42   | 1.38   | 7.0               | 0.77           | 8               |             |      |      |      |    |  |
| SDF <sub>T2</sub> | 0.88              | 1.38              | 0.50   | 1.75   | 6.0               | 0.56           | 8               |             |      |      |      |    |  |
| NSF <sub>T2</sub> | 0.92              | 0.67              | 1.42   | 1.25   | 4.5               | 0.31           | 8               |             |      |      |      |    |  |
| SEP <sub>T2</sub> | 0.82              | 0.69              | 1.07   | 0.88   | 5.5               | 0.47           | 8               |             |      |      |      |    |  |
| TCH <sub>T2</sub> | 1.13              | 0.79              | 1.00   | 0.25   | 6.5               | 0.66           | 8               |             |      |      |      |    |  |
| EXC <sub>T2</sub> | 2.08              | 0.67              | 2.00   | 2.00   | 8.0               | 1.00           | 8               |             |      |      |      |    |  |
| ATT <sub>T2</sub> | 2.75              | 1.25              | 2.25   | 0.80   | 7.0               | 0.77           | 8               |             |      |      |      |    |  |
| NRG <sub>T2</sub> | 1.50              | 1.75              | 3.00   | 0.50   | 0.0               | <b>0.02</b>    | 8               | 1.00        |      |      |      |    |  |
| sIgA              | Δ10 <sub>T2</sub> | Weak              | 33.98  | 102.49 | SDA <sub>T2</sub> | 0.69           | 0.89            | 0.50        | 1.00 | 4.5  | 0.59 | 7  |  |
|                   |                   |                   |        |        | ODA <sub>T2</sub> | 0.19           | 0.56            | 0.00        | 0.25 | 2.5  | 0.20 | 7  |  |
|                   |                   | Strong            | -77.55 | -4.87  | DDA <sub>T2</sub> | 0.75           | 1.25            | 1.00        | 0.50 | 5.5  | 0.86 | 7  |  |
|                   |                   |                   |        |        | DDF <sub>T2</sub> | 0.75           | 0.25            | 1.25        | 2.00 | 4.5  | 0.58 | 7  |  |
|                   |                   | RIV <sub>T2</sub> | -      | -      | -                 | -              | -               | -           | 2    |      |      |    |  |

| Marker            | Physiol. change   | Marker range      |        | C-BARQ | Weak response     |                | Strong response |             | U    | P    | N           | ES |      |
|-------------------|-------------------|-------------------|--------|--------|-------------------|----------------|-----------------|-------------|------|------|-------------|----|------|
|                   |                   | Group             | Min    |        | Max               | (median ± IQR) | (median ± IQR)  |             |      |      |             |    |      |
| sIgA              | Δ40 <sub>T2</sub> | Weak              | 117.28 | 237.31 | TRA <sub>T2</sub> | 2.63           | 0.38            | 3.13        | 0.38 | 0.0  | <b>0.03</b> | 7  | 1.00 |
|                   |                   |                   |        |        | CHA <sub>T2</sub> | 2.63           | 1.50            | 1.25        | 2.50 | 3.0  | 0.29        | 7  |      |
|                   |                   |                   |        |        | SDF <sub>T2</sub> | 0.13           | 0.88            | 0.00        | 1.00 | 5.0  | 0.70        | 7  |      |
|                   |                   |                   |        |        | NSF <sub>T2</sub> | 1.67           | 1.17            | 0.67        | 0.67 | 2.5  | 0.21        | 7  |      |
|                   |                   |                   |        |        | SEP <sub>T2</sub> | 0.89           | 0.80            | 0.88        | 0.12 | 6.0  | 1.00        | 7  |      |
|                   |                   |                   |        |        | TCH <sub>T2</sub> | 1.38           | 0.79            | 0.25        | 0.75 | 1.0  | 0.08        | 7  |      |
|                   |                   |                   |        |        | EXC <sub>T2</sub> | 2.34           | 0.88            | 1.67        | 1.00 | 2.0  | 0.16        | 7  |      |
|                   |                   |                   |        |        | ATT <sub>T2</sub> | 2.17           | 0.42            | 2.50        | 0.50 | 2.0  | 0.15        | 7  |      |
|                   |                   |                   |        |        | NRG <sub>T2</sub> | 2.50           | 1.75            | 2.00        | 2.00 | 4.5  | 0.59        | 7  |      |
|                   |                   | Strong            | -52.45 | 14.46  | SDA <sub>T2</sub> | 0.20           | 1.60            | 0.50        | 1.00 | 4.5  | 1.00        | 6  |      |
|                   |                   |                   |        |        | ODA <sub>T2</sub> | 0.13           | 0.25            | 0.00        | 0.25 | 3.5  | 0.64        | 6  |      |
|                   |                   |                   |        |        | DDA <sub>T2</sub> | 0.00           | 1.25            | 1.00        | 0.50 | 2.5  | 0.37        | 6  |      |
|                   |                   |                   |        |        | DDF <sub>T2</sub> | 0.75           | 1.25            | 1.25        | 2.00 | 2.5  | 0.38        | 6  |      |
|                   |                   |                   |        |        | RIV <sub>T2</sub> | -              | -               | -           | -    | -    | -           | 3  |      |
|                   |                   |                   |        |        | TRA <sub>T2</sub> | 2.50           | 1.00            | 3.13        | 0.38 | 0.0  | <b>0.05</b> | 6  | 1.00 |
|                   |                   |                   |        |        | CHA <sub>T2</sub> | 1.00           | 2.75            | 1.25        | 2.50 | 4.0  | 0.83        | 6  |      |
|                   |                   |                   |        |        | SDF <sub>T2</sub> | 1.25           | 1.50            | 0.00        | 1.00 | 2.0  | 0.25        | 6  |      |
|                   |                   |                   |        |        | NSF <sub>T2</sub> | 1.50           | 0.50            | 0.67        | 0.67 | 0.0  | <b>0.05</b> | 6  | 1.00 |
| SEP <sub>T2</sub> | 0.29              | 1.38              | 0.88   | 0.12   | 3.0               | 0.51           | 6               |             |      |      |             |    |      |
| TCH <sub>T2</sub> | 1.50              | 0.75              | 0.25   | 0.75   | 0.0               | <b>0.05</b>    | 6               | 1.00        |      |      |             |    |      |
| EXC <sub>T2</sub> | 1.67              | 1.43              | 1.67   | 1.00   | 3.5               | 0.66           | 6               |             |      |      |             |    |      |
| ATT <sub>T2</sub> | 2.33              | 1.00              | 2.50   | 0.50   | 4.0               | 0.82           | 6               |             |      |      |             |    |      |
| NRG <sub>T2</sub> | 2.00              | 3.00              | 2.00   | 2.00   | 4.0               | 0.82           | 6               |             |      |      |             |    |      |
| CgA               | Δ10 <sub>T1</sub> | Weak              | -42.15 | -0.49  | SDA <sub>T2</sub> | 0.78           | 0.90            | 1.25        | 1.20 | 11.5 | 0.17        | 13 |      |
|                   |                   |                   |        |        | ODA <sub>T2</sub> | 0.25           | 0.88            | 0.07        | 0.38 | 17.0 | 0.55        | 13 |      |
|                   |                   |                   |        |        | DDA <sub>T2</sub> | 1.25           | 1.50            | 0.67        | 0.75 | 18.0 | 0.66        | 13 |      |
|                   |                   |                   |        |        | DDF <sub>T2</sub> | 1.00           | 1.00            | 1.00        | 0.75 | 21.0 | 1.00        | 13 |      |
|                   |                   |                   |        |        | RIV <sub>T2</sub> | 0.50           | 1.50            | 1.00        | 2.00 | 5.0  | 0.71        | 7  |      |
|                   |                   |                   |        |        | TRA <sub>T2</sub> | 2.75           | 0.50            | 2.19        | 0.26 | 10.5 | 0.13        | 13 |      |
|                   |                   |                   |        |        | CHA <sub>T2</sub> | 2.50           | 2.00            | 3.00        | 1.17 | 10.5 | 0.13        | 13 |      |
|                   |                   |                   |        |        | SDF <sub>T2</sub> | 0.00           | 0.50            | 1.75        | 2.25 | 4.0  | <b>0.01</b> | 13 | 0.91 |
|                   |                   |                   |        |        | NSF <sub>T2</sub> | 1.00           | 1.16            | 1.17        | 1.00 | 20.5 | 0.94        | 13 |      |
|                   |                   | SEP <sub>T2</sub> | 1.00   | 0.64   | 0.69              | 0.87           | 19.0            | 0.77        | 13   |      |             |    |      |
|                   |                   | TCH <sub>T2</sub> | 1.00   | 1.00   | 0.84              | 0.75           | 18.0            | 0.66        | 13   |      |             |    |      |
|                   |                   | EXC <sub>T2</sub> | 2.17   | 1.66   | 3.25              | 1.33           | 4.0             | <b>0.02</b> | 13   | 0.91 |             |    |      |
|                   |                   | ATT <sub>T2</sub> | 2.17   | 0.67   | 2.92              | 1.43           | 12.0            | 0.20        | 13   |      |             |    |      |
|                   |                   | NRG <sub>T2</sub> | 3.00   | 0.50   | 2.75              | 1.50           | 21.0            | 1.00        | 13   |      |             |    |      |
|                   |                   | Strong            | -60.67 | -8.01  | SDA <sub>T2</sub> | 0.80           | 0.80            | 0.89        | 1.00 | 11.0 | 0.29        | 12 |      |
|                   |                   |                   |        |        | ODA <sub>T2</sub> | 0.00           | 0.25            | 0.25        | 1.13 | 11.5 | 0.29        | 12 |      |
|                   |                   |                   |        |        | DDA <sub>T2</sub> | 1.00           | 1.25            | 1.00        | 1.00 | 17.0 | 0.93        | 12 |      |
|                   |                   |                   |        |        | DDF <sub>T2</sub> | 1.25           | 2.00            | 0.75        | 1.25 | 11.5 | 0.32        | 12 |      |
| RIV <sub>T2</sub> | -                 |                   |        |        | -                 | -              | -               | -           | -    | 7    |             |    |      |
| TRA <sub>T2</sub> | 2.88              |                   |        |        | 0.25              | 2.50           | 0.63            | 7.0         | 0.09 | 12   |             |    |      |
| CHA <sub>T2</sub> | 2.50              |                   |        |        | 1.42              | 2.33           | 1.00            | 14.5        | 0.62 | 12   |             |    |      |
| SDF <sub>T2</sub> | 1.00              |                   |        |        | 1.25              | 0.50           | 2.50            | 15.5        | 0.74 | 12   |             |    |      |
| NSF <sub>T2</sub> | 1.17              |                   |        |        | 0.50              | 1.67           | 1.33            | 7.0         | 0.08 | 12   |             |    |      |
| SEP <sub>T2</sub> | 1.00              | 0.12              | 1.14   | 1.00   | 13.0              | 0.46           | 12              |             |      |      |             |    |      |
| TCH <sub>T2</sub> | 0.75              | 0.33              | 1.00   | 1.25   | 12.5              | 0.41           | 12              |             |      |      |             |    |      |
| EXC <sub>T2</sub> | 1.67              | 0.50              | 2.83   | 1.16   | 5.0               | <b>0.04</b>    | 12              | 0.71        |      |      |             |    |      |

| Marker            | Physiol. change  | Marker range      |                  | C-BARQ | Weak response     |                | Strong response   |             | U    | P    | N           | ES          |      |      |
|-------------------|------------------|-------------------|------------------|--------|-------------------|----------------|-------------------|-------------|------|------|-------------|-------------|------|------|
|                   |                  | Group             | Min              |        | Max               | (median ± IQR) | (median ± IQR)    |             |      |      |             |             |      |      |
| Cortisol          | $\Delta 10_{T1}$ | Weak              | -8.92            | 0.46   | ATT <sub>T2</sub> | 2.50           | 1.00              | 2.33        | 1.43 | 16.5 | 0.87        | 12          | 0.71 |      |
|                   |                  |                   |                  |        | NRG <sub>T2</sub> | 2.00           | 0.50              | 3.00        | 1.00 | 4.5  | <b>0.03</b> | 12          |      |      |
|                   |                  | Strong            | 0.50             | 4.43   | SDA <sub>T2</sub> | 0.75           | 0.50              | 0.69        | 0.20 | 17.5 | 0.94        | 12          |      |      |
|                   |                  |                   |                  |        | ODA <sub>T2</sub> | 0.09           | 0.25              | 0.07        | 0.38 | 16.5 | 0.80        | 12          |      |      |
|                   |                  | DDA <sub>T2</sub> | 1.00             | 0.92   | 0.25              | 1.00           | 11.0              | 0.26        | 12   |      |             |             |      |      |
|                   |                  | DDF <sub>T2</sub> | 0.75             | 1.25   | 0.63              | 0.50           | 17.0              | 0.87        | 12   |      |             |             |      |      |
|                   |                  | RIV <sub>T2</sub> | -                | -      | -                 | -              | -                 | -           | 6    |      |             |             |      |      |
|                   |                  | TRA <sub>T2</sub> | 2.94             | 0.38   | 2.44              | 0.38           | 6.5               | 0.07        | 12   |      |             |             |      |      |
|                   |                  | CHA <sub>T2</sub> | 1.79             | 1.50   | 2.25              | 1.75           | 16.5              | 0.81        | 12   |      |             |             |      |      |
|                   |                  | SDF <sub>T2</sub> | 0.50             | 1.25   | 0.38              | 2.25           | 16.0              | 0.74        | 12   |      |             |             |      |      |
|                   |                  | NSF <sub>T2</sub> | 1.00             | 1.33   | 1.09              | 0.66           | 16.0              | 0.75        | 12   |      |             |             |      |      |
|                   |                  | SEP <sub>T2</sub> | 1.01             | 0.37   | 0.88              | 0.51           | 15.0              | 0.63        | 12   |      |             |             |      |      |
|                   |                  | TCH <sub>T2</sub> | 0.88             | 0.92   | 0.84              | 1.00           | 17.5              | 0.94        | 12   |      |             |             |      |      |
|                   |                  | EXC <sub>T2</sub> | 1.84             | 1.16   | 2.25              | 0.67           | 15.0              | 0.63        | 12   |      |             |             |      |      |
|                   |                  | ATT <sub>T2</sub> | 2.67             | 1.00   | 2.17              | 0.17           | 5.0               | <b>0.04</b> | 12   | 0.85 |             |             |      |      |
|                   |                  | Cortisol          | $\Delta 40_{T1}$ | Weak   | -7.45             | 1.94           | NRG <sub>T2</sub> | 3.00        | 2.00 |      | 2.75        | 1.00        |      | 17.5 |
| SDA <sub>T2</sub> | 0.70             |                   |                  |        |                   |                | 0.60              | 0.79        | 1.00 |      | 12.5        | 0.38        | 12   |      |
| Strong            | 2.71             |                   |                  | 9.32   | ODA <sub>T2</sub> | 0.00           | 0.25              | 0.09        | 0.38 |      | 14.0        | 0.47        | 12   |      |
|                   |                  |                   |                  |        | DDA <sub>T2</sub> | 0.54           | 1.25              | 1.25        | 1.75 |      | 11.0        | 0.26        | 12   |      |
| DDF <sub>T2</sub> | 0.75             |                   |                  | 1.25   | 0.63              | 1.00           | 16.0              | 0.74        | 12   |      |             |             |      |      |
| RIV <sub>T2</sub> | 0.75             |                   |                  | 1.50   | 0.00              | 1.00           | 4.5               | 0.56        | 7    |      |             |             |      |      |
| TRA <sub>T2</sub> | 2.88             |                   |                  | 0.63   | 2.51              | 0.62           | 10.5              | 0.23        | 12   |      |             |             |      |      |
| CHA <sub>T2</sub> | 1.79             |                   |                  | 1.83   | 2.25              | 1.75           | 14.5              | 0.57        | 12   |      |             |             |      |      |
| SDF <sub>T2</sub> | 0.50             |                   |                  | 1.25   | 1.38              | 2.75           | 13.0              | 0.41        | 12   |      |             |             |      |      |
| NSF <sub>T2</sub> | 1.17             |                   |                  | 1.16   | 1.09              | 0.66           | 17.0              | 0.87        | 12   |      |             |             |      |      |
| SEP <sub>T2</sub> | 0.88             |                   |                  | 1.25   | 1.07              | 0.39           | 14.0              | 0.52        | 12   |      |             |             |      |      |
| TCH <sub>T2</sub> | 1.00             |                   |                  | 0.50   | 0.67              | 1.00           | 16.0              | 0.75        | 12   |      |             |             |      |      |
| EXC <sub>T2</sub> | 1.84             |                   |                  | 1.66   | 2.25              | 1.34           | 11.5              | 0.30        | 12   |      |             |             |      |      |
| ATT <sub>T2</sub> | 2.50             |                   |                  | 1.16   | 2.42              | 0.50           | 12.0              | 0.33        | 12   |      |             |             |      |      |
| sIgA              | $\Delta 10_{T1}$ |                   |                  | Weak   | 1.82              | 29.88          | NRG <sub>T2</sub> | 3.00        | 2.00 |      | 3.00        | 1.00        | 14.5 | 0.56 |
|                   |                  |                   |                  |        |                   |                | SDA <sub>T2</sub> | 0.60        | 1.00 | 0.84 | 0.50        | 13.0        | 0.71 | 11   |
|                   |                  | Strong            | -179.96          | -18.23 | ODA <sub>T2</sub> | 0.38           | 0.63              | 0.13        | 0.25 | 7.0  | 0.14        | 11          |      |      |
|                   |                  |                   |                  |        | DDA <sub>T2</sub> | 1.00           | 1.00              | 1.13        | 0.75 | 12.0 | 0.58        | 11          |      |      |
|                   |                  | DDF <sub>T2</sub> | 0.50             | 1.00   | 1.00              | 1.00           | 9.0               | 0.27        | 11   |      |             |             |      |      |
|                   |                  | RIV <sub>T2</sub> | -                | -      | -                 | -              | -                 | -           | 4    |      |             |             |      |      |
|                   |                  | TRA <sub>T2</sub> | 2.38             | 1.00   | 3.07              | 0.50           | 3.0               | <b>0.03</b> | 11   | 0.83 |             |             |      |      |
|                   |                  | CHA <sub>T2</sub> | 2.50             | 1.00   | 2.29              | 1.25           | 10.0              | 0.36        | 11   |      |             |             |      |      |
|                   |                  | SDF <sub>T2</sub> | 0.00             | 1.00   | 0.25              | 1.00           | 15.0              | 1.00        | 11   |      |             |             |      |      |
|                   |                  | NSF <sub>T2</sub> | 0.83             | 1.00   | 0.92              | 1.66           | 13.0              | 0.71        | 11   |      |             |             |      |      |
|                   |                  | SEP <sub>T2</sub> | 1.14             | 0.88   | 1.00              | 0.26           | 13.5              | 0.78        | 11   |      |             |             |      |      |
|                   |                  | TCH <sub>T2</sub> | 0.33             | 1.00   | 0.88              | 0.75           | 15.0              | 1.00        | 11   |      |             |             |      |      |
|                   |                  | EXC <sub>T2</sub> | 2.83             | 0.34   | 2.09              | 0.66           | 7.5               | 0.17        | 11   |      |             |             |      |      |
|                   |                  | ATT <sub>T2</sub> | 2.67             | 0.84   | 2.59              | 1.16           | 14.0              | 0.85        | 11   |      |             |             |      |      |
|                   |                  | NRG <sub>T2</sub> | 3.00             | 0.50   | 2.75              | 1.50           | 14.5              | 0.92        | 11   |      |             |             |      |      |
|                   |                  | sIgA              | $\Delta 40_{T1}$ | Weak   | 11.21             | 158.71         | SDA <sub>T2</sub> | 0.60        | 1.30 |      | 0.78        | 0.29        | 7.5  | 1.00 |
| ODA <sub>T2</sub> | 0.17             |                   |                  |        |                   |                | 1.63              | 0.25        | 0.38 |      | 7.0         | 0.88        | 8    |      |
| Strong            | -85.37           |                   |                  | 6.97   | DDA <sub>T2</sub> | 1.00           | 1.25              | 1.00        | 0.92 |      | 5.5         | 0.55        | 8    |      |
|                   |                  |                   |                  |        | DDF <sub>T2</sub> | 0.00           | 0.25              | 1.25        | 0.50 |      | 0.0         | <b>0.02</b> | 8    | 1.00 |
| RIV <sub>T2</sub> | -                |                   |                  | -      | -                 | -              | -                 | -           | 3    |      |             |             |      |      |

| Marker | Physiol. change | Marker range |     | C-BARQ | Weak response |                | Strong response |  | U | P | N | ES |
|--------|-----------------|--------------|-----|--------|---------------|----------------|-----------------|--|---|---|---|----|
|        |                 | Group        | Min |        | Max           | (median ± IQR) | (median ± IQR)  |  |   |   |   |    |
|        |                 |              |     |        |               |                |                 |  |   |   |   |    |
|        |                 |              |     |        |               |                |                 |  |   |   |   |    |
|        |                 |              |     |        |               |                |                 |  |   |   |   |    |
|        |                 |              |     |        |               |                |                 |  |   |   |   |    |
|        |                 |              |     |        |               |                |                 |  |   |   |   |    |
|        |                 |              |     |        |               |                |                 |  |   |   |   |    |
|        |                 |              |     |        |               |                |                 |  |   |   |   |    |
|        |                 |              |     |        |               |                |                 |  |   |   |   |    |
|        |                 |              |     |        |               |                |                 |  |   |   |   |    |
|        |                 |              |     |        |               |                |                 |  |   |   |   |    |
|        |                 |              |     |        |               |                |                 |  |   |   |   |    |
|        |                 |              |     |        |               |                |                 |  |   |   |   |    |

The upper panel presents data from T1 (puppy stage), the middle panel from T2 (young adult stage), the lower panel combines physiological data from T1 with C-BARQ data from T2 (prediction). Dogs with a “strong response” have the largest physiological change (above median), as expected for that marker (increase for CgA and cortisol, decrease for sIgA).

Δ10 / Δ40: change in salivary marker concentration 10/40 min after the behavioral test, compared to pre-test

Marker range: min – max change in salivary marker concentration for each marker, at the specified sample moment (Δ10 / Δ40) and per group; measurement units: pmol/mL (CgA), nmol/L (cortisol), EU/mL (sIgA; EU = Elisa Units).

SDA: Stranger-directed aggression; ODA: Owner-directed aggression; DDA: Dog-directed aggression; DDF: Dog-directed fear; RIV: Dog rivalry; TRA: Trainability; CHA: Chasing; SDF: Stranger-directed fear; NSF: Non-social fear; SEP: Separation-related behavior; TCH: Touch sensitivity; EXC: Excitability; ATT: Attachment and attention-seeking; NRG: Energy. C-BARQ scores derived from questionnaire scales (0–4, no measurement unit).

ES: effect size (probabilistic index), calculated for significant results only

- : analyses could not be performed with maximum two dogs in one group (weak/strong response)

**bold:** P-values < 0.05
